# Supplementary material for: Structure-based inhibitory peptide design targeting peptide-substrate binding site in EGFR tyrosine kinase
Source: PubMed Central journal article supplement (PMC6530890; doi:10.1371/journal.pone.0217031), 2019-05-22

A1

**Interactions**

- van der Waals
- Attractive Charge
- Conventional Hydrogen Bond
- Carbon Hydrogen Bond
- Unfavorable Donor-Donor
- Pi-Cation
- Pi-Alkyl

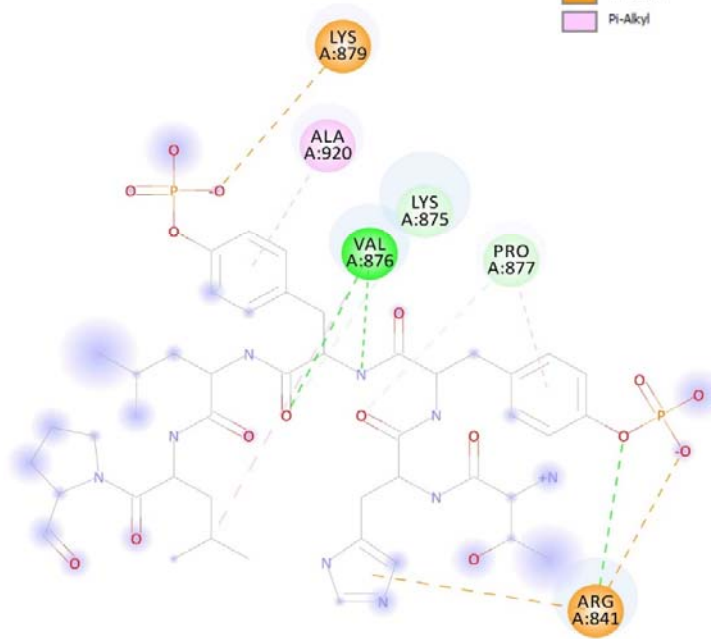

A2

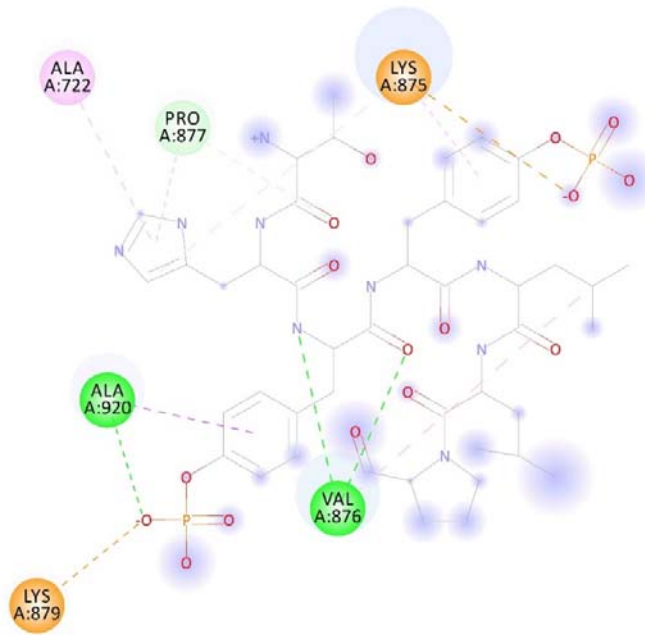

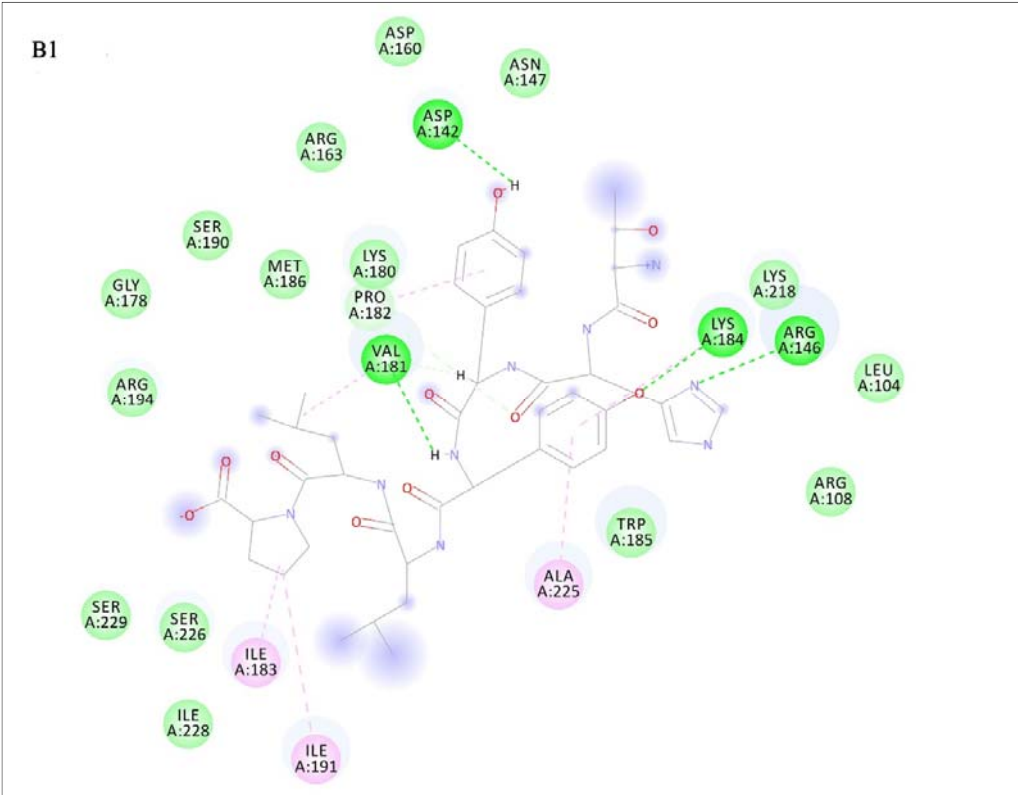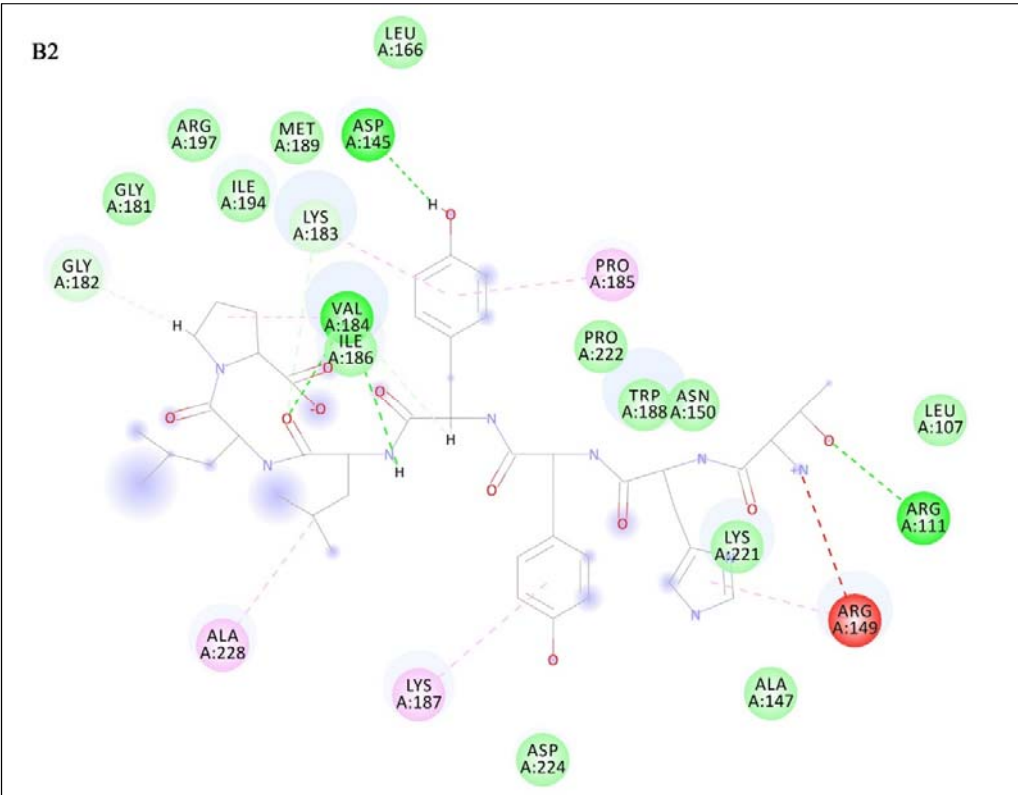

C1

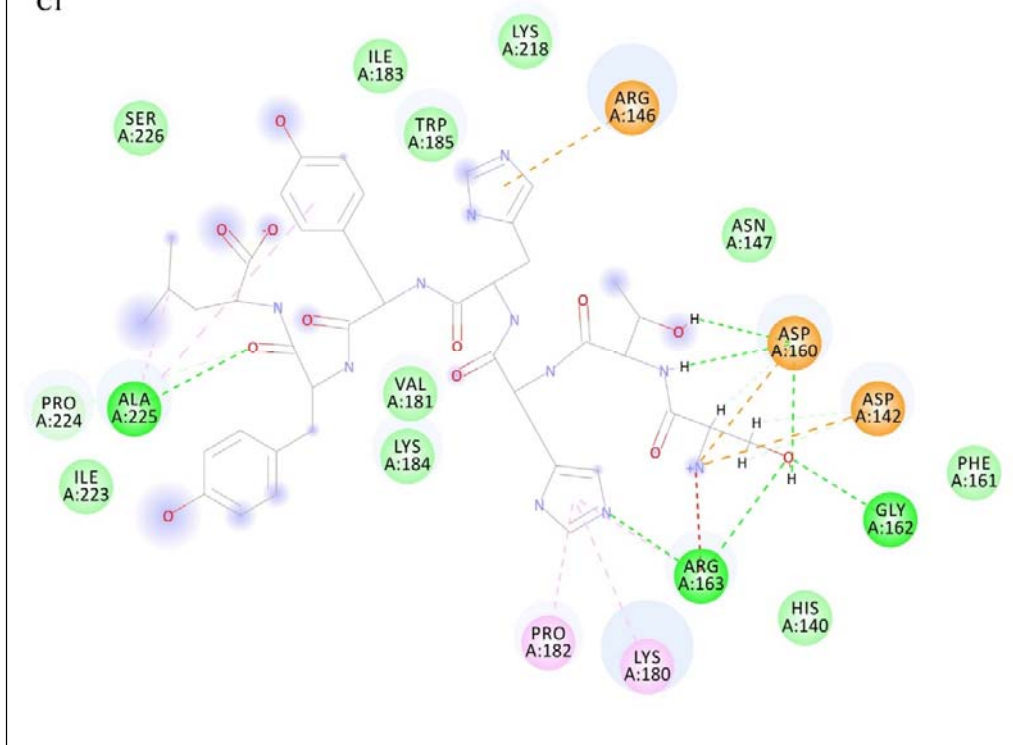

C2

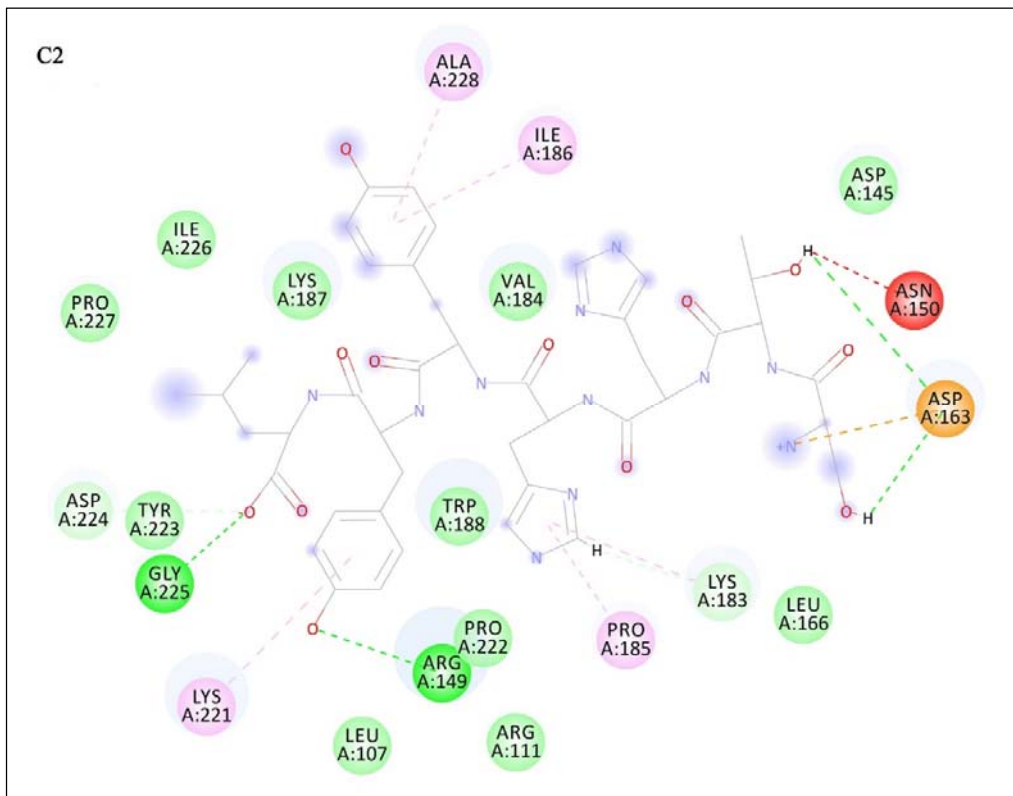

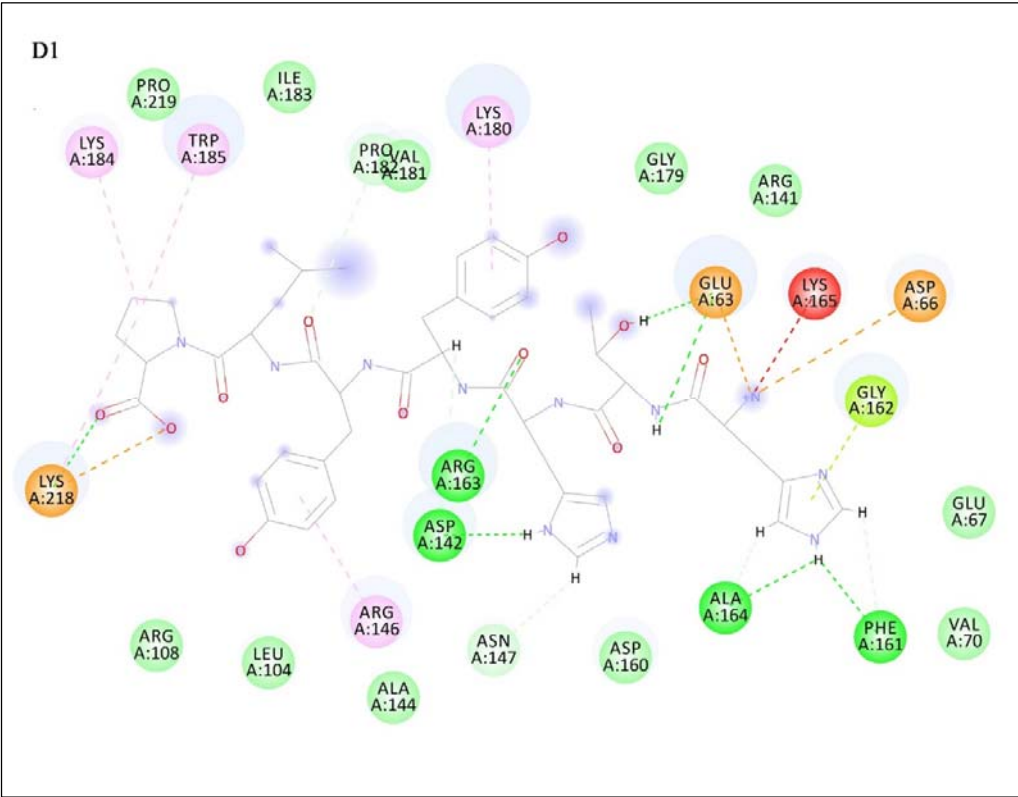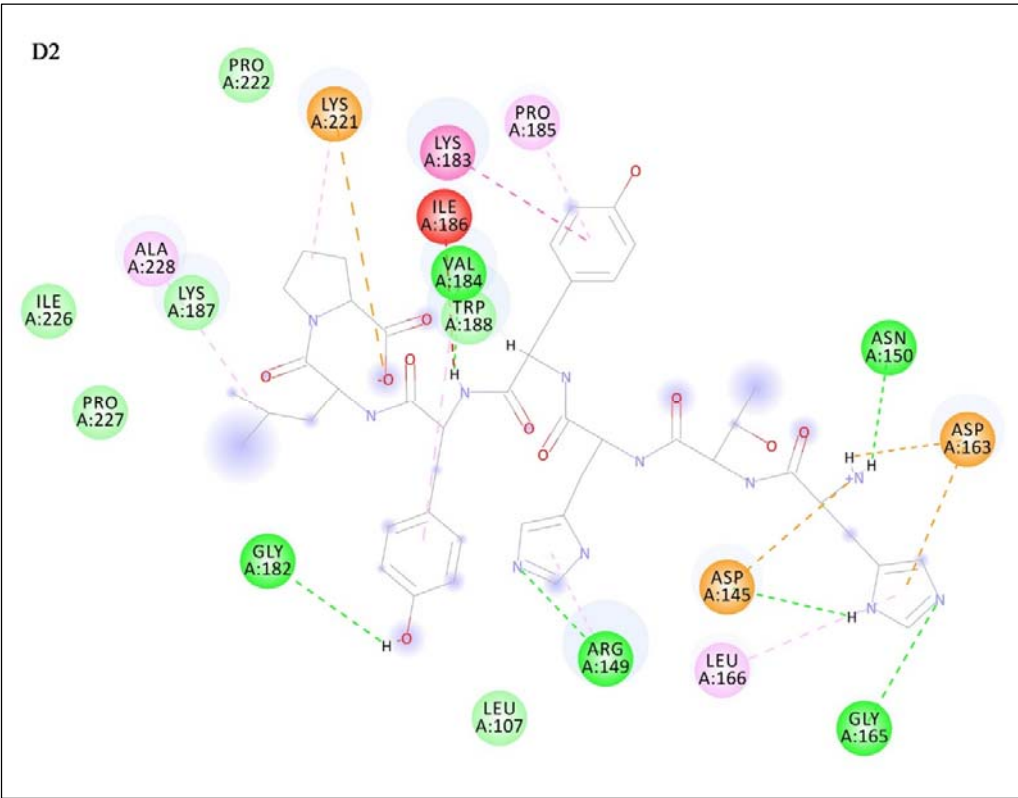

E1

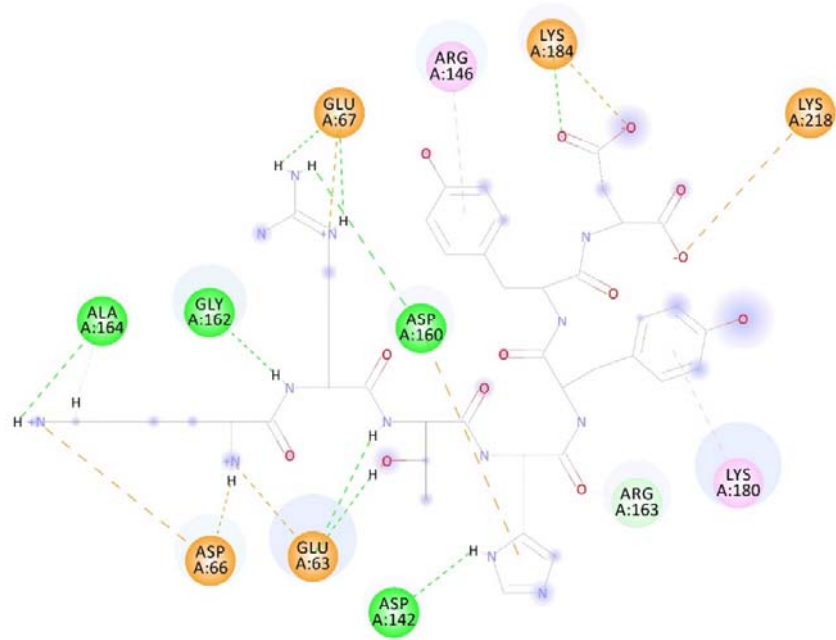

E2

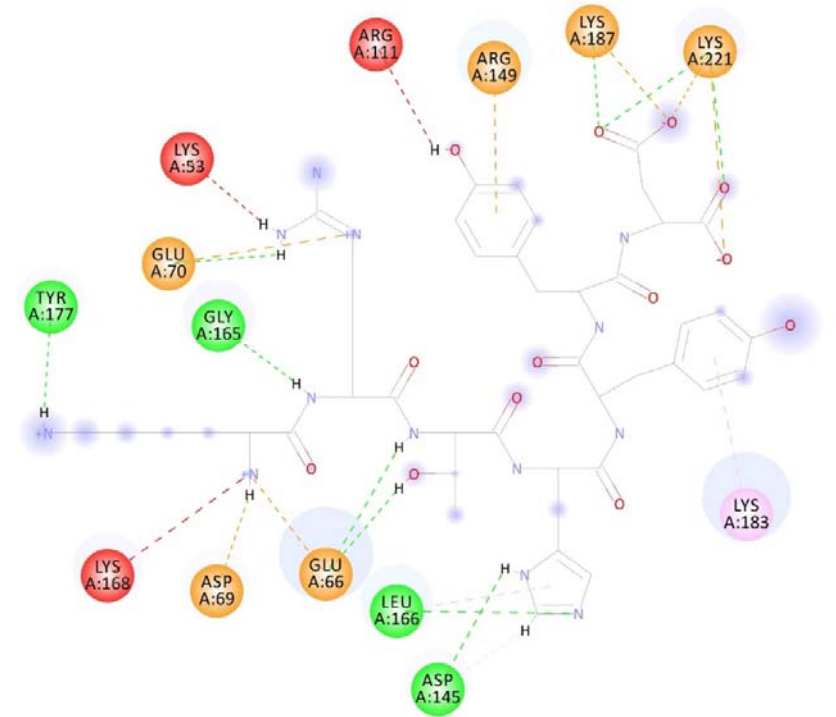

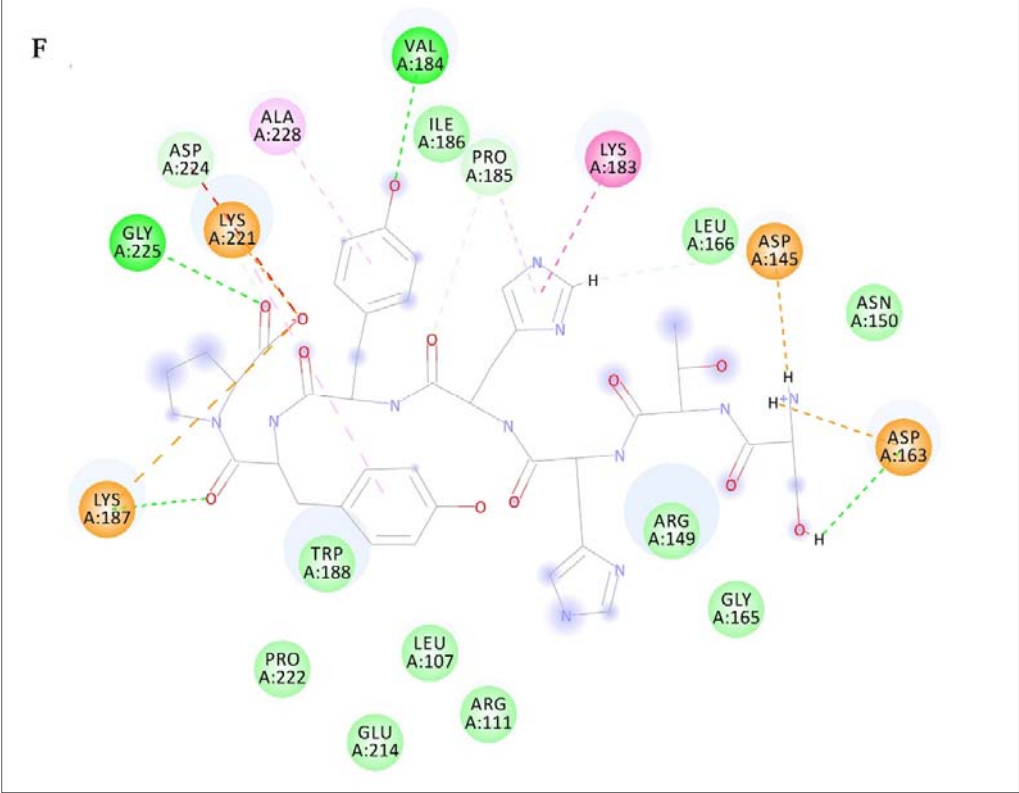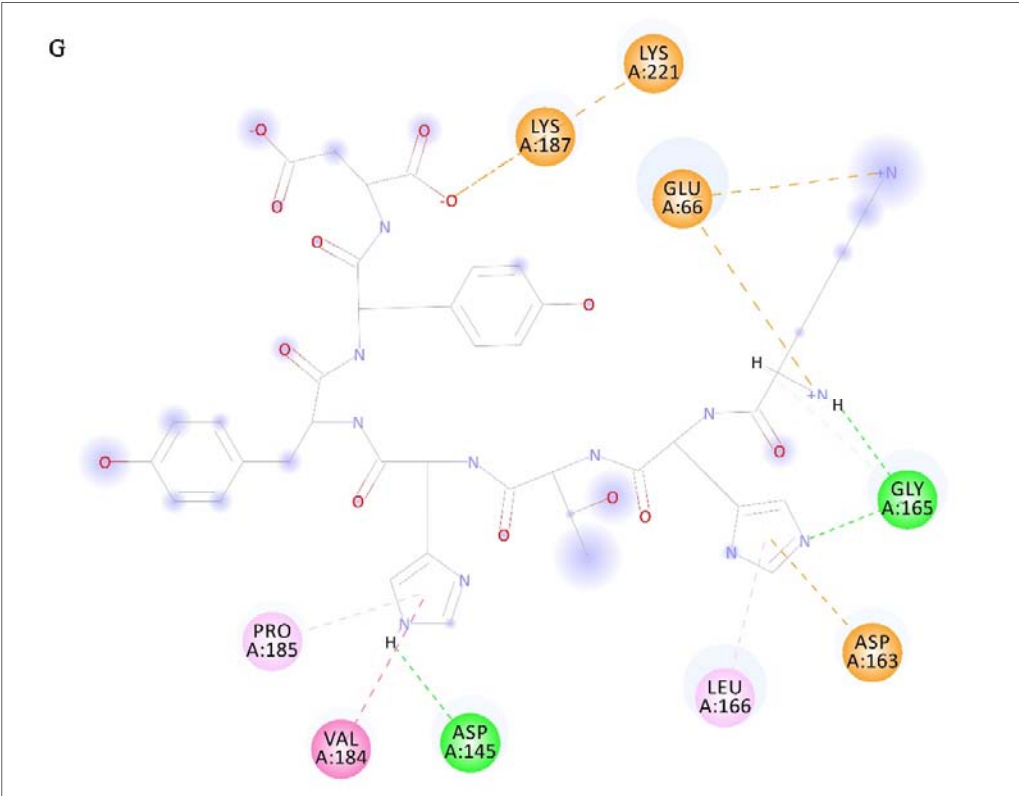

Supplement: pone.0217031.s001.pdf [file pone.0217031.s001.pdf]
