# Supplementary material for: Structure-based inhibitory peptide design targeting peptide-substrate binding site in EGFR tyrosine kinase
Source: PubMed Central journal article supplement (PMC6530890; doi:10.1371/journal.pone.0217031), 2019-05-22
Supplement: pone.0217031.s006.pdf [file pone.0217031.s006.pdf]

**S1 Table: Binding scores of top scoring poses with WT-EGFR and EGFR L858R ( PDB: 4ZJV, 4R3R ).**

| Peptide name | Peptide sequences | Interaction scores<br>(REU) |               | Number of residues* |               |
|--------------|-------------------|-----------------------------|---------------|---------------------|---------------|
|              |                   | WT-EGFR                     | EGFR<br>L858R | WT-EGFR             | EGFR<br>L858R |
| MIG6-pYpY    | THpYpYLLP         | -                           | -             | 5                   | 6             |
| MIG6-YY      | THYYLLP           | -15.695                     | -16.941       | 8                   | 7             |
| 1            | STYYTLP           | -15.734                     | -15.155       | 5                   | 8             |
| 2            | TSNGNVLP          | -14.598                     | -18.179       | 4                   | 7             |
| 3            | THNNLLP           | -15.336                     | -15.101       | 8                   | 6             |
| 4            | TPRHLLP           | -16.792                     | -16.565       | 6                   | 7             |
| 5            | STHHYYP           | -16.599                     | -19.640       | 8                   | 9             |
| 6            | STHHYYL           | -17.608                     | -19.131       | 7                   | 7             |
| 7            | THHYYP            | -16.283                     | -14.386       | 9                   | 5             |
| 8            | THHYYP            | -16.432                     | -14.874       | 10                  | 6             |
| 9            | HTHYYP            | -17.832                     | -15.561       | 7                   | 6             |
| 10           | HTHYYP            | -21.908                     | -20.212       | 10                  | 8             |
| 11           | HSHYYP            | -15.298                     | -17.939       | 6                   | 10            |
| 12           | TSHYYP            | -15.733                     | -17.238       | 6                   | 9             |
| 13           | THYELLP           | -15.489                     | -14.287       | 8                   | 7             |
| 14           | STQQLP            | -13.968                     | -14.273       | 7                   | 4             |
| 15           | TTHYYP            | -13.451                     | -13.624       | 4                   | 5             |
| 16           | TTYHHP            | -14.395                     | -16.913       | 7                   | 7             |
| 17           | TTHHYYP           | -17.868                     | -17.766       | 7                   | 10            |
| 18           | SSHHYYP           | -16.739                     | -16.278       | 6                   | 8             |
| 19           | STHYHYP           | -17.390                     | -16.389       | 7                   | 5             |
| 20           | STHHYYP           | -15.602                     | -17.231       | 6                   | 8             |
| 21           | SHTHYYP           | -18.951                     | -16.600       | 9                   | 4             |
| 22           | SHTHYYP           | -14.567                     | -18.136       | 6                   | 7             |
| 23           | STHHYYD           | -16.254                     | -17.543       | 6                   | 8             |
| 24           | SHTHYYP           | -18.214                     | -18.720       | 7                   | 4             |
| 25           | SHTHYYP           | -18.096                     | -17.710       | 8                   | 8             |
| 26           | KHTHYYP           | -16.047                     | -19.982       | 6                   | 8             |

---

|    |         |         |         |    |   |
|----|---------|---------|---------|----|---|
| 27 | KRTHYYD | -16.638 | -20.093 | 8  | 6 |
| 28 | STHYECD | -15.955 | -15.961 | 5  | 7 |
| 29 | STHYEHD | -16.567 | -18.116 | 6  | 6 |
| 30 | HENYYED | -19.879 | -15.918 | 10 | 7 |
| 31 | RHDYYWD | -18.840 | -18.745 | 4  | 6 |

---

REU: Rosetta Energy Unit is a standard energy unit used by FlexPepDock server to score complexes

\* Indicates the number of amino acids in the EGFR peptide substrate binding site in interaction with the peptides
