# Supplementary material for: Structure-based inhibitory peptide design targeting peptide-substrate binding site in EGFR tyrosine kinase
Source: PubMed Central journal article supplement (PMC6530890; doi:10.1371/journal.pone.0217031), 2019-05-22
Supplement: pone.0217031.s007.pdf [file pone.0217031.s007.pdf]

**S2 Table. Comparison of WT-EGFR and EGFR L858R total binding energy calculated by Rosetta FlexPepDock and MM-PBSA.**

| Peptides          | Peptide sequences | Rosetta FlexPepDock |            | MM-PBSA    |            |
|-------------------|-------------------|---------------------|------------|------------|------------|
|                   |                   | Server (REU)        |            | (kcal/mol) |            |
|                   |                   | WT-EGFR             | EGFR L858R | WT-EGFR    | EGFR L858R |
| <b>MIG6-YY</b>    | THYYLLP           | -15.695             | -16.941    | -16.397    | -18.706    |
| <b>Peptide 5</b>  | STHHYYP           | -16.599             | -19.640    | -4.497     | -23.923    |
| <b>Peptide 6</b>  | STHHYYL           | -17.608             | -19.131    | -30.592    | -9.205     |
| <b>Peptide 10</b> | HTHYLP            | -21.908             | -20.212    | -15.675    | -44.791    |
| <b>Peptide 26</b> | KHTHYYD           | -16.047             | -19.982    | -8.544     | -25.098    |
| <b>Peptide 27</b> | KRTHYYD           | -16.638             | -20.093    | -45.258    | -46.426    |
