# Supplementary material for: Structure-based inhibitory peptide design targeting peptide-substrate binding site in EGFR tyrosine kinase
Source: PubMed Central journal article supplement (PMC6530890; doi:10.1371/journal.pone.0217031), 2019-05-22
Supplement: pone.0217031.s008.pdf [file pone.0217031.s008.pdf]

**S3 Table. Physicochemical properties of peptides MIG6-pYpY, MIG6-YY, 5, 6, 10, 26 and 27.**

| <b>Peptides</b>  | <b>MW<br/>(Da)</b> | <b>HBD</b> | <b>HBA</b> | <b>LogP</b> | <b>LogD</b> | <b>LogSw</b> | <b>Solubility<br/>(mg/l)</b> |
|------------------|--------------------|------------|------------|-------------|-------------|--------------|------------------------------|
| <b>MIG6-pYpY</b> | 1053.02            | 16         | 25         | -0.37       | -3.62       | -4.44        | 12378.22                     |
| <b>MIG6-YY</b>   | 908.05             | 13         | 20         | 1.56        | -0.89       | -5.03        | 5928.75                      |
| <b>5</b>         | 905.95             | 15         | 23         | -2.37       | -5.24       | -2.65        | 64168.61                     |
| <b>6</b>         | 904.99             | 15         | 22         | -0.84       | -3.44       | -3.40        | 30079.38                     |
| <b>10</b>        | 915.03             | 13         | 21         | 0.52        | -2.20       | -4.45        | 10665.21                     |
| <b>26</b>        | 955.07             | 18         | 24         | -4.56       | -8.00       | -1.11        | 315731.47                    |
| <b>27</b>        | 974.11             | 22         | 25         | -5.03       | -8.47       | -0.73        | 470356.39                    |
